# Supplementary material for: Human Epidermal Zinc Concentrations after Topical Application of ZnO Nanoparticles in Sunscreens
Source: MDPI journal article supplement (doi:10.3390/ijms222212372), 2021-11-16
Supplement: s1 [file s1]

## Supplementary Material

### Human epidermal zinc concentrations after topical application of ZnO nanoparticles in sunscreens

Zahra Khabir<sup>a,b\*</sup>, Amy M. Holmes<sup>c\*</sup>, Yi-Jen Lai<sup>a</sup>, Liuen Liang<sup>a,b</sup>, Anand Deva<sup>a</sup>, Michael A. Polikarpov<sup>d</sup>,  
Michael S. Roberts<sup>c,e§</sup>, Andrei V. Zvyagin<sup>a,f§</sup>

<sup>a</sup> Macquarie University, Sydney, Australia

<sup>b</sup> ARC Centre of Excellence for Nanoscale BioPhotonics,

<sup>c</sup> University of South Australia, Basil Hetzel Institute for Translational Health Research, Adelaide, Australia

<sup>d</sup> National Research Centre "Kurchatov Institute", Moscow, Russia

<sup>e</sup> Diamantina Institute, University of Queensland, Brisbane, Australia

<sup>f</sup> Centre of Biomedical Engineering, Sechenov University, Russia

\*These authors contributed equally to this work

§Correspondence: A/prof Andrei Zvyagin (andrei.zvyagin@mq.edu.au), Prof. Michael Roberts  
(m.roberts@uq.edu.au)

#### 1. Synthesis of ZnO-PEG nanoparticles (NPs) via chemical co-precipitation method

The experimental procedure consisted of two steps. First, the zinc acetate was synthesized using ZnO micron-sized powder (99.9% Sigma-Aldrich) and acetic acid (ACS reagent,  $\geq 99.7\%$ , Sigma-Aldrich) as precursors. The molar ratio of acetic acid to Zn ions was 2:1. The required amount of ZnO powder was dissolved in acetic acid solution (3.8M) under vigorous stirring at 50 °C to get a clear solution. By further heating, the solution was completely evaporated, and the white powder of zinc acetate remained. The dried zinc acetate powder is collected and is used as a precursor in the synthesis of ZnO nanoparticles. The flowchart below describes the first part:

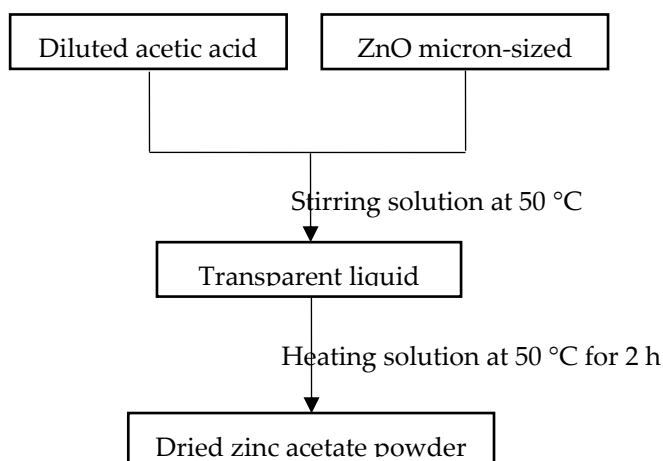

To optimise the synthesis procedure of ZnO NPs in order to tailor the particle size, different molar ratios of  $[\text{KOH}]/[\text{Zn}^{2+}]$  and different amount of Poly(ethylene glycol) (PEG; average molecular weight 200 Da, Sigma-Aldrich) were tried. The general synthesis procedure is shown in the following flowchart and table S1 summarizes the synthesis parameters and characteristics of the synthesized samples (S1-S5). For characterization of samples, transmission electron microscope (TEM, PhilipsCM10, Netherlands), X-ray diffraction (XRD), and Photoluminescence (PL) spectroscopy (Fluorolog-Tau3 spectrofluorometer,

JobinYvon-Horiba, Edison, USA) were used. Fig. S1 shows the TEM images of samples with different synthesis parameters. Fig. S2 presents XRD patterns and PL spectra of the same samples.

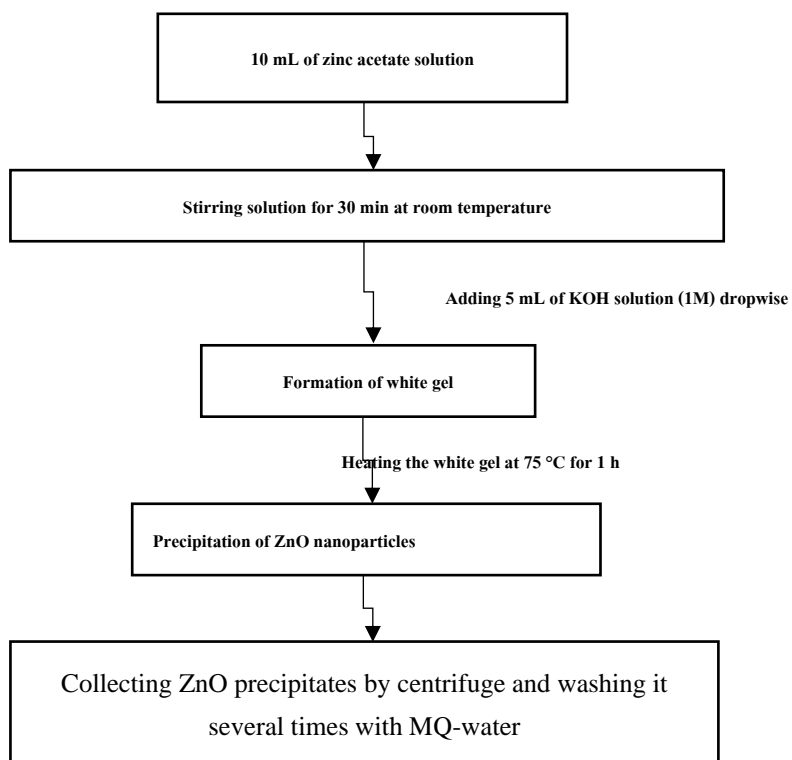

**Table S1** Characteristics of the samples and the synthesis parameters.

| Sample ID | Crystallite size (nm) | Particle size (nm) | PEG (μL) | [KOH]/[Zn <sup>2+</sup> ] |
|-----------|-----------------------|--------------------|----------|---------------------------|
| S1        | 18.3                  | 38                 | 222      | 2                         |
| S2        | 16.59                 | 26                 | 444      | 2                         |
| S3        | 16.07                 | 25                 | 666      | 2                         |
| S4        | 15.58                 | 23                 | 444      | 2.5                       |
| S5        | -                     | 22                 | 666      | 3                         |

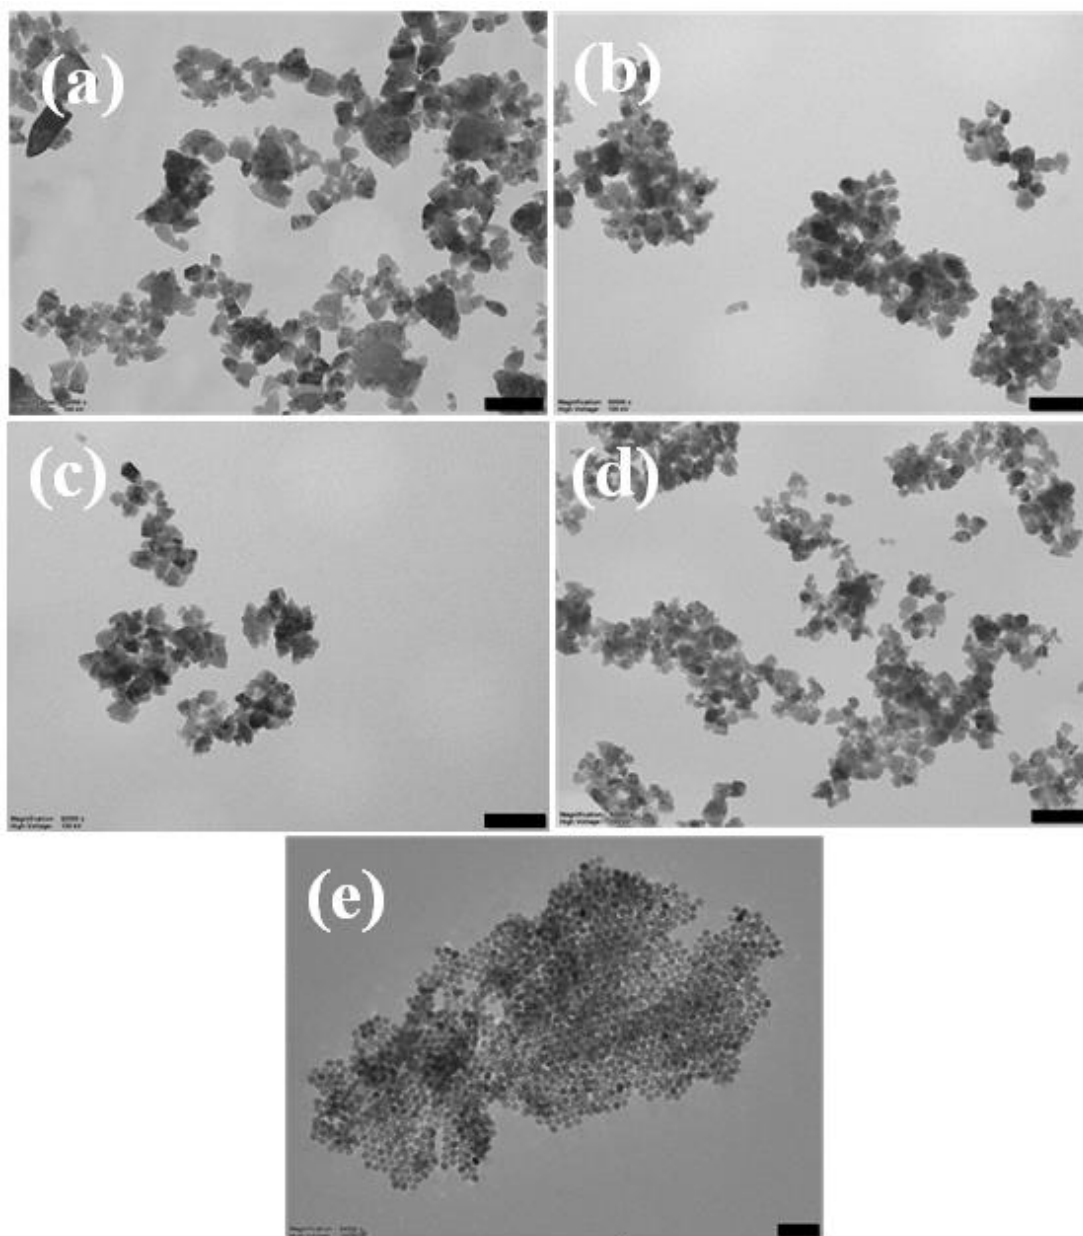

**Fig. S1.** TEM images of S1 a), S2 b), and S3 c), S4 d), and S5 e). Scale bar 100 nm.

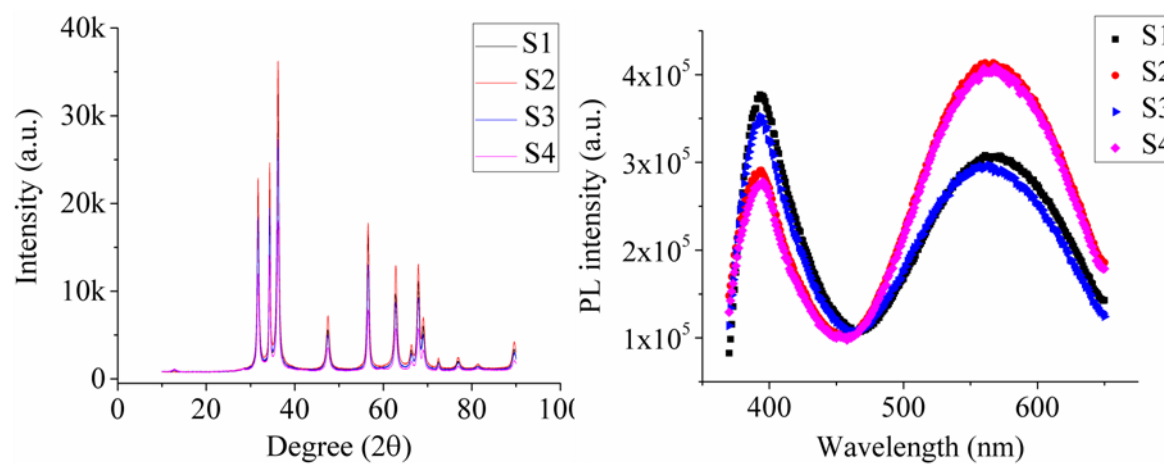

**Fig. S2.** XRD patterns (left) and PL spectra of ZnO-PEG NPs (right).

## 2. Determination of normal zinc level in human skin with ICP-MS and LA-ICP-MS

Human skin sample from a female donor (aged 35 years) was cut into small pieces and homogenized in MQ water with a homogenizer (Polytron, USA). After turning the tissue into a paste, it was transferred to the cryomold (Tissue-Tek® Biopsy, square 10×10×5mm) and was dried overnight in a biosafety cabinet. Next day, the sample was collected, divided into two, then prepared for LA-ICP-MS and ICP-MS analyses following the protocols described in sections 2.7 and 2.8, respectively. For ICP-MS analysis, the unknown concentration of zinc was determined through the calibration curve set of 2.5, 5, 10, 25, and 50 ppb.

## 3. Conversion of $\mu\text{g/g}$ unit to $\mu\text{g/mL}$ for zinc concentration in skin

As explained in the text (subsection 3.4, first paragraph), the water content of skin tissue is 70%. It means, for wet skin tissue, 0.7 g is for water and 0.3 g for dry tissue. Besides, the density of wet skin is 1 g/mL that means 1 g of skin is equivalent to 1 mL. 1 g is equivalent to 0.3 mL for dry skin. Therefore, the concentrations of 13  $\mu\text{g/g}$  and 3.1  $\mu\text{g/g}$  are equivalent to 4.3  $\mu\text{g/mL}$  and 1.0  $\mu\text{g/mL}$  respectively.

## 4. Determination of labile zinc species in cell mediated culture media with ZP1

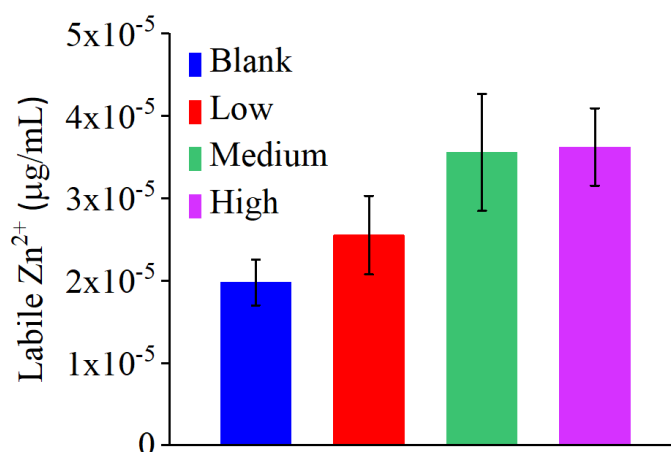

**Fig. S3.** Labile zinc concentrations measured by ZP1 in HaCaT cell-mediated culture media (24 h) after addition of increasing amounts of ZnO-PEG NP. Blank, Low, Medium and High stand for cell incubation with 0, 5, 25 and 50  $\mu\text{g/mL}$  of <sup>67</sup>ZnO-PEG NPs, respectively. The data format: mean  $\pm$  SD, n = 3.
